# Supplementary material for: Syntheses, crystal, photoluminescence and electrochemical investigation of some new phenylmercury(ii) dithiocarbamate complexes involving ferrocene
Source: Royal Society of Chemistry journal article supplement (doi:10.1039/b917871f), 2010-01-01
Supplement: b917871f.pdf [file b917871f.pdf]

## SUPPLEMENTARY INFORMATIONS

### Syntheses, crystal, photoluminescence and electrochemical investigation of some new phenylmercury(II) dithiocarbamate complexes involving ferrocene

Nanhai Singh,<sup>a\*</sup> Abhinav Kumar,<sup>a§</sup> Rajendra Prasad,<sup>a</sup> Kieran C. Molloy,<sup>b</sup> and Mary F. Mahon<sup>b</sup>

<sup>a</sup>Department of Chemistry, Faculty of Science, Banaras Hindu University, Varanasi-221 005, India

<sup>b</sup>Department of Chemistry, University of Bath, Bath BA2 7AY, UK.

<sup>§</sup>Present address: Department of Chemistry, Faculty of Science, Lucknow University, Lucknow 226 007, India

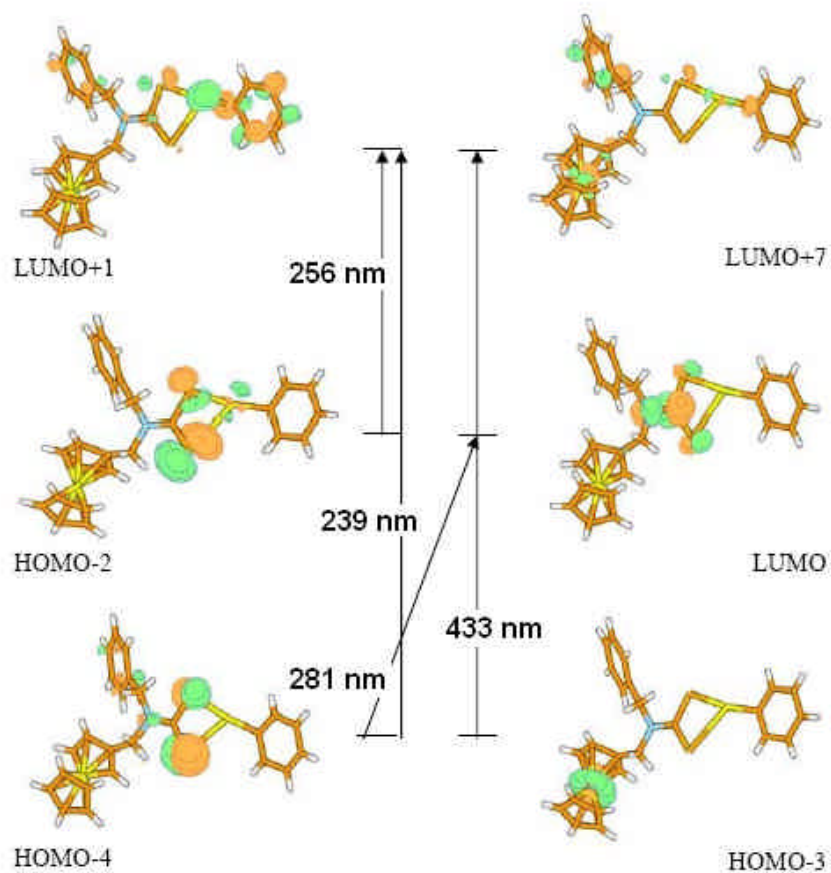

**Fig. S1** Selected orbital transitions for **1**. Orbital contour values are 0.05.

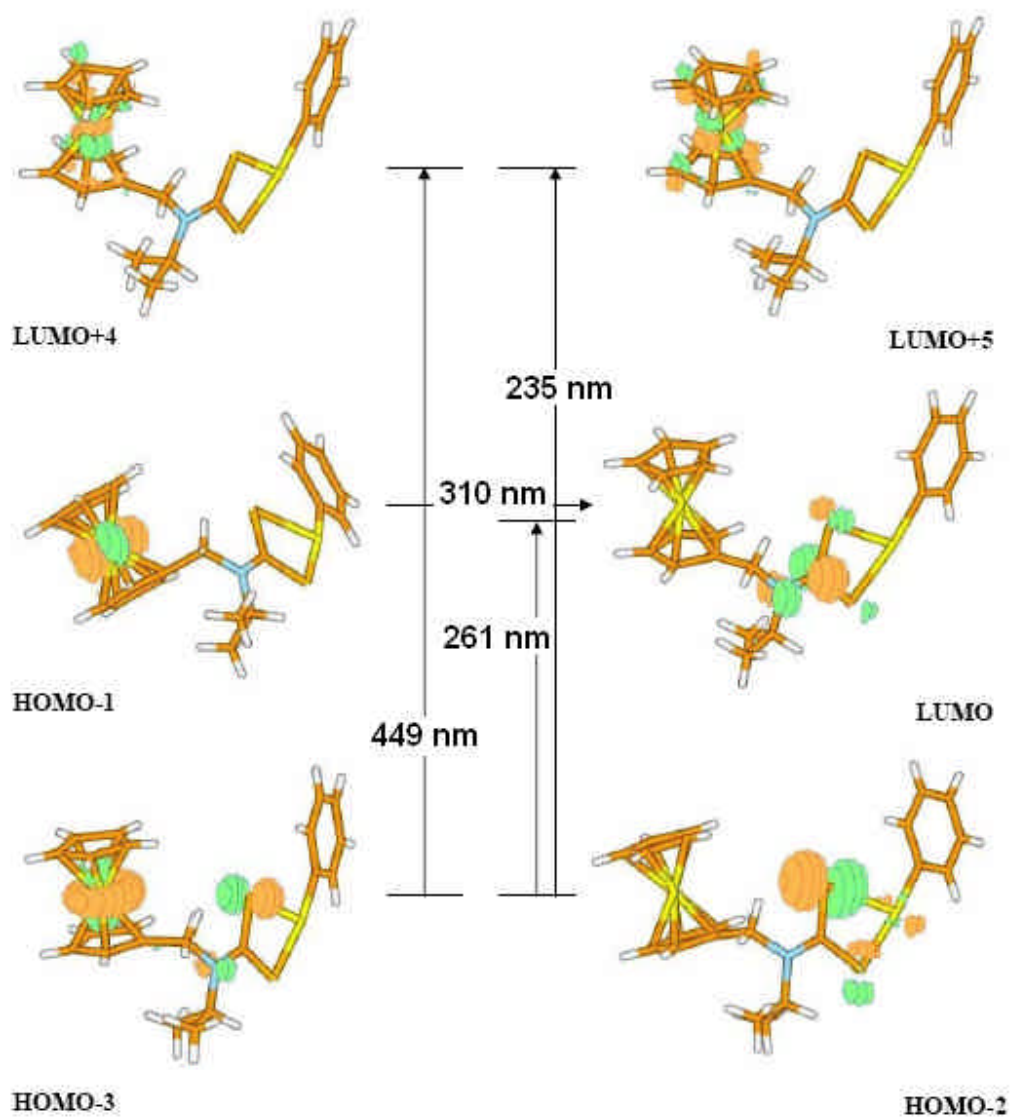

**Fig. S2** Selected orbital transitions for **2**. Orbital contour values are 0.05.

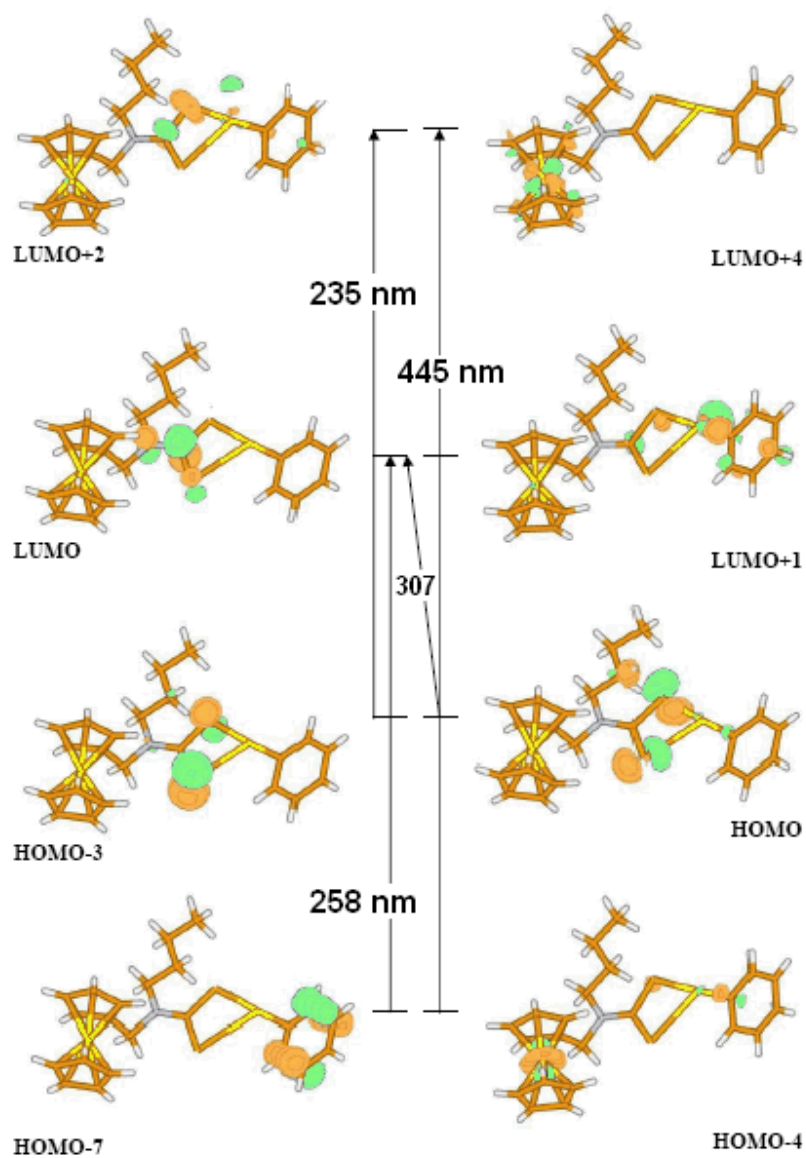

**Fig. S3** Selected orbital transitions for **3**. Orbital contour values are 0.05.
